# Supplementary material for: Recent African strains of Zika virus display higher transmissibility and fetal pathogenicity than Asian strains
Source: PubMed Central journal article supplement (PMC7876148; doi:10.1038/s41467-021-21199-z), 2021-02-10
Supplement: 41467_2021_21199_MOESM3_ESM.pdf [file 41467_2021_21199_MOESM3_ESM.pdf]

### **Description of Additional Supplementary Files**

File Name: Supplementary Software 1

Description: Custom code used to perform epidemiological simulations. The file contains the R script and complete instructions for installing and running the script.
