# Supplementary material for: Recent African strains of Zika virus display higher transmissibility and fetal pathogenicity than Asian strains
Source: Nat Commun. 2021 Feb 10;12:916. doi: 10.1038/s41467-021-21199-z (PMC7876148; doi:10.1038/s41467-021-21199-z)
Supplement: Supplementary file 1 — Supplementary Information [file 41467_2021_21199_MOESM1_ESM.pdf]

## Supporting information

**Supplementary File 1. Custom code used to perform epidemiological simulations.** The file contains the R script and complete instructions for installing and running the script.

**Supplementary Table 1. ZIKV strains included in this study.** The name of the ZIKV strains used in the study with their country of origin, original strain name, source of isolation, year of collection and the passage history prior to use in this study are indicated. TS: *Toxorhynchites splendens* mosquitoes; C6/36: *Aedes albopictus* cells; Vero: green monkey kidney cells; SM: suckling mouse brains.

| Name in this study | Country          | Strain ID      | Source                                             | Year | Passage history                |
|--------------------|------------------|----------------|----------------------------------------------------|------|--------------------------------|
| F_Polynesia_2013   | French Polynesia | PF13/251013-18 | Human serum                                        | 2013 | C6/36-4                        |
| Puerto_Rico_2015   | Puerto Rico      | PRVABC59       | Human serum                                        | 2015 | Vero-2; C6/36-3                |
| Philippines_2012   | Philippines      | CPC-0740       | Human serum                                        | 2012 | TS-1; C6/36-2; Vero-1; C6/36-1 |
| Thailand_2014      | Thailand         | SV0127-14      | Human serum                                        | 2014 | TS-1; C6/36-2; Vero-1; C6/36-1 |
| Cambodia_2010      | Cambodia         | FSS13025       | Human serum                                        | 2010 | Vero 2; SM-1; C6/36-1          |
| Senegal_2011       | Senegal          | Kedougou2011   | Pool of <i>Aedes</i> spp. and <i>Mansonia</i> spp. | 2011 | C6/36-2                        |
| Senegal_2015       | Senegal          | Kedougou2015   | Pool of <i>Aedes</i> spp. and <i>Mansonia</i> spp. | 2015 | C6/36-2                        |

**Supplementary Table 2. Parameter estimates of mosquito-to-human transmission events.** The transmission kinetics of each ZIKV strain were modeled with a two-parameter log-logistic function to estimate their extrinsic incubation period (EIP) distribution. In the epidemiological simulations, the probability of mosquito-to-human transmission for each contact between a human and an infected mosquito was determined by the transmission probability inferred for each ZIKV strain from the EIP log-logistic distributions of location =  $\log(e)$ , and scale =  $1/b$ .

| <b>ZIKV strain</b> | <b>Log-logistic parameter estimates</b> |          |
|--------------------|-----------------------------------------|----------|
|                    | <i>e</i>                                | <i>b</i> |
| F_Polynesia_2013   | 16.60                                   | −10.83   |
| Puerto_Rico_2015   | 20.74                                   | −8.17    |
| Thailand_2014      | 18.76                                   | −24.86   |
| Philippines_2012   | 19.01                                   | −5.72    |
| Cambodia_2010      | 17.66                                   | −4.99    |
| Senegal_2015       | 12.05                                   | −3.24    |

**Supplementary Table 3. Oligonucleotides used in this study.**

| Application                                                    | Oligo          | Sequence (5'-3')                                                                                                                          |
|----------------------------------------------------------------|----------------|-------------------------------------------------------------------------------------------------------------------------------------------|
| ZIKV RNA quantification in mosquito experiments                | Forward Primer | GTATGGAATGGAGATAAGGCCCA                                                                                                                   |
|                                                                | Reverse primer | ACCAGCACTGCCATTGATGTGC                                                                                                                    |
| ZIKV RNA quantification in mouse experiments (Asian strains)   | Forward primer | CCGCTGCCCAACACAAG                                                                                                                         |
|                                                                | Reverse primer | CCACTAACGTTCTTTTGCAGACAT                                                                                                                  |
|                                                                | Probe          | 6FAM/AGCCTACCT/ZEN/TGACAAGCAATCAGACACTCAA/3'IABkFQ                                                                                        |
| ZIKV RNA quantification in mouse experiments (African strains) | Forward primer | GTCGCTGTCCAACACAAG                                                                                                                        |
|                                                                | Reverse primer | CACCAGTGTCTCTTGCAGACAT                                                                                                                    |
|                                                                | Probe          | 6FAM/AGCCTACCT/ZEN/TGACAAGCAATCAGACACTCAA/3'IABkFQ                                                                                        |
| ZIKV RNA standards in mouse experiments (Asian strains)        | gBlock         | GAGGCATCAATATCAGACATGGCTTCTGACAGCCGCTGCCAACACAAGGTGAAGCCTACCTTGACAAGCAATCAGACACTCAATATGTCTGCAAAAGAACGTTAGTGGACAGAGGCTGGGGAAATGGATGTGGACT  |
| ZIKV RNA standards in mouse experiments (African strains)      | gBlock         | GAGGCATCAATATCGGACATGGCTTCGGACAGTCGCTGTCCAACACAAGGTGAAGCCTACCTTGACAAGCAATCAGACACTCAATATGTCTGCAAGAGAACACTGGTGGATAGAGGTTGGGGAAATGGGTGTGGACT |

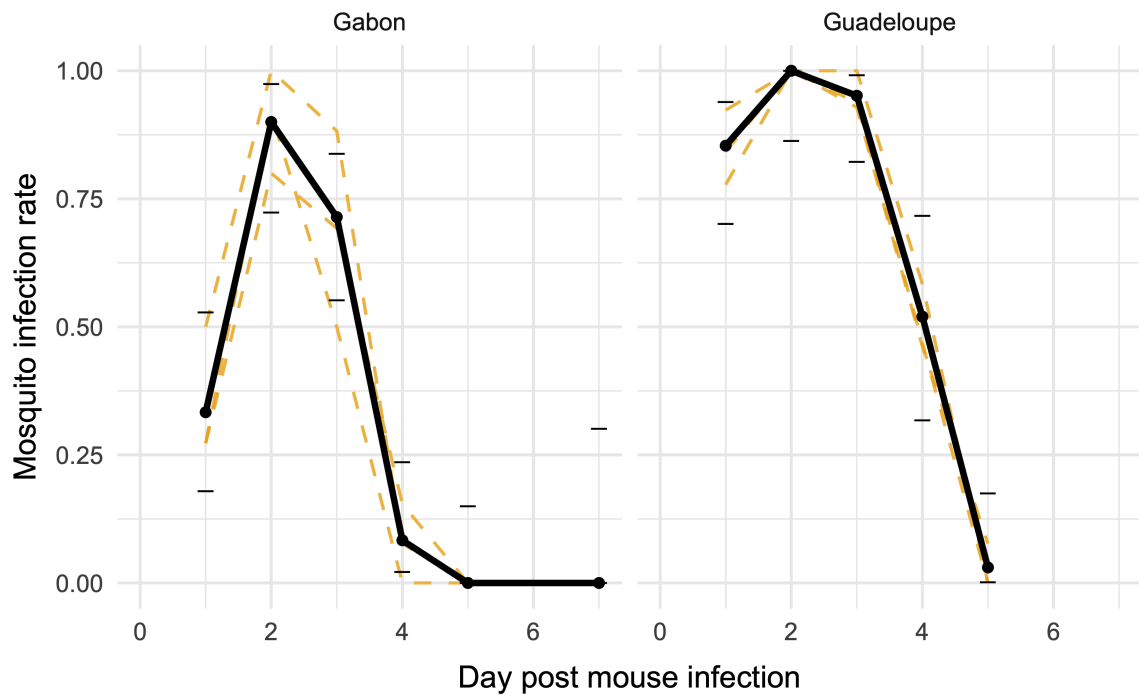

**Supplementary Fig. 1. Mouse-to-mosquito ZIKV transmission probability over time.** The lines represent the proportion of *Ae. aegypti* mosquitoes from Gabon (left) or Guadeloupe (right) that tested ZIKV-positive 14 days after taking a blood meal on the same triplet of *Ifnar1*<sup>-/-</sup> mice inoculated with 10<sup>5</sup> FFU of the Cambodia\_2010 ZIKV strain on day 0. A median of 11 females per time point and per mouse (range 2-17) were tested for the Gabon population. A median of 13 females per time point and per mouse (range 0-19) were tested for the Guadeloupe population. The gold dashed lines represent the transmission probabilities for the 3 individual mice during their viremic period and the black line represent their mean. Horizontal ticks indicate the 95% confidence intervals of the probabilities. Source data are provided as a Source Data file.

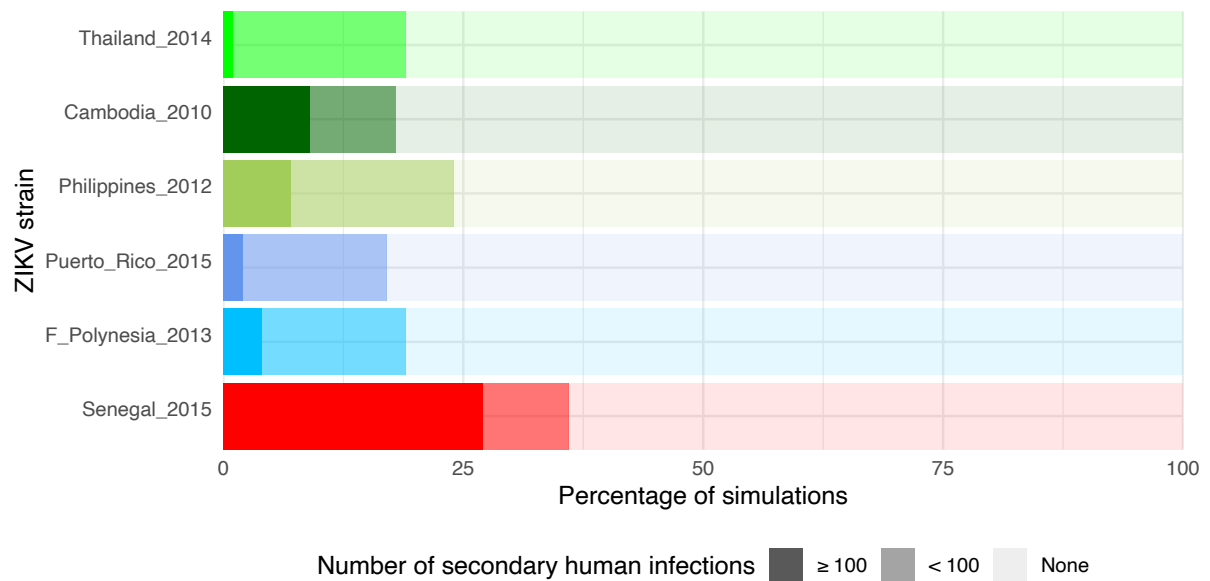

**Supplementary Fig. 2. Simulated effect of empirical variation in ZIKV transmissibility on the risk and magnitude of human outbreaks with reduced mosquito susceptibility.** The figure shows the simulations results of Fig. 3 when the highly ZIKV susceptible mosquito population from Guadeloupe is replaced with a less susceptible mosquito population from Gabon (Fig. S1) to parameterize human-to-mosquito transmission events.

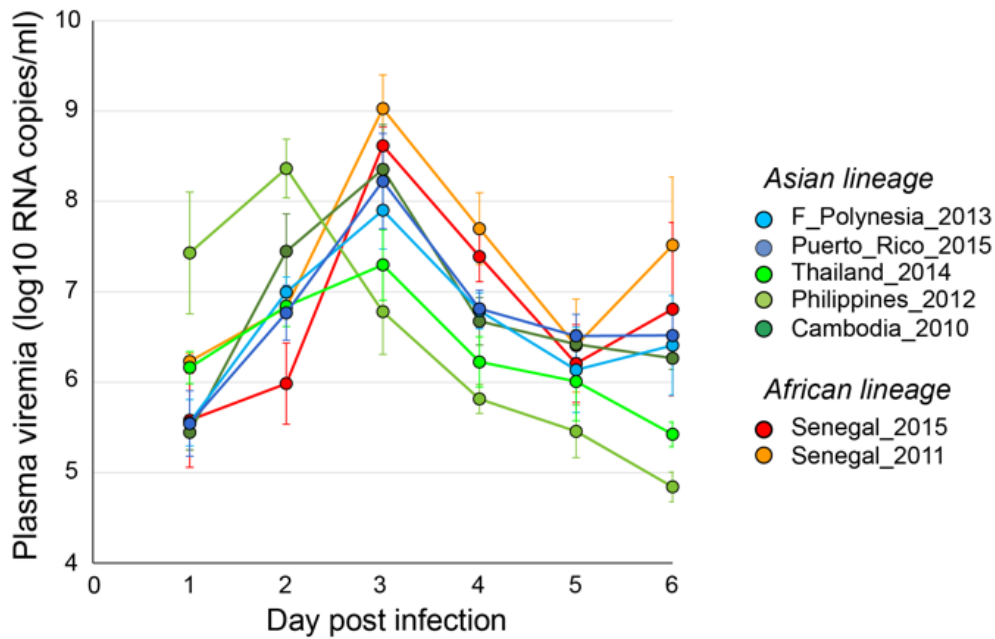

**Supplementary Fig. 3. Variation in viremia kinetics between ZIKV strains after inoculation of a high virus dose.** Time course of ZIKV viremia in AG129 mice inoculated on day 0 with  $10^3$  PFU of ZIKV. Viremia is expressed in log<sub>10</sub>-transformed viral genome copies per ml of plasma (mean  $\pm$  standard error). Each virus strain is represented by  $n=5$  mice on each day, with the exception of day 6 for the Senegal\_2011 and Senegal\_2015 strains that are represented by  $n=10$  mice. Source data are provided as a Source Data file.

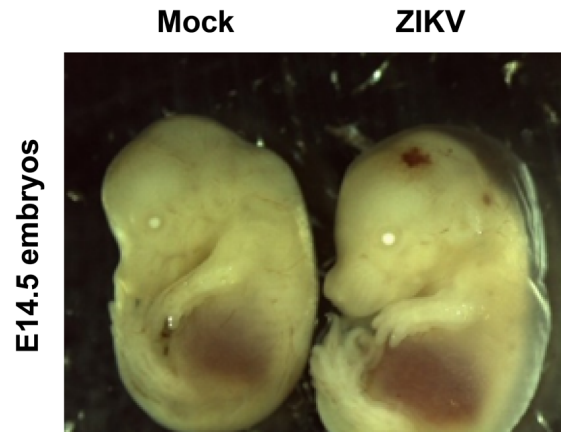

**Supplementary Fig. 4. Intraplacental injections of ZIKV induce subcutaneous edema.** Photos show representative E14.5 embryos after intraplacental injection of mock inoculum (left;  $n=10$  embryos) or Senegal\_2015 ZIKV strain (right;  $n=9$  embryos) at E10.5.

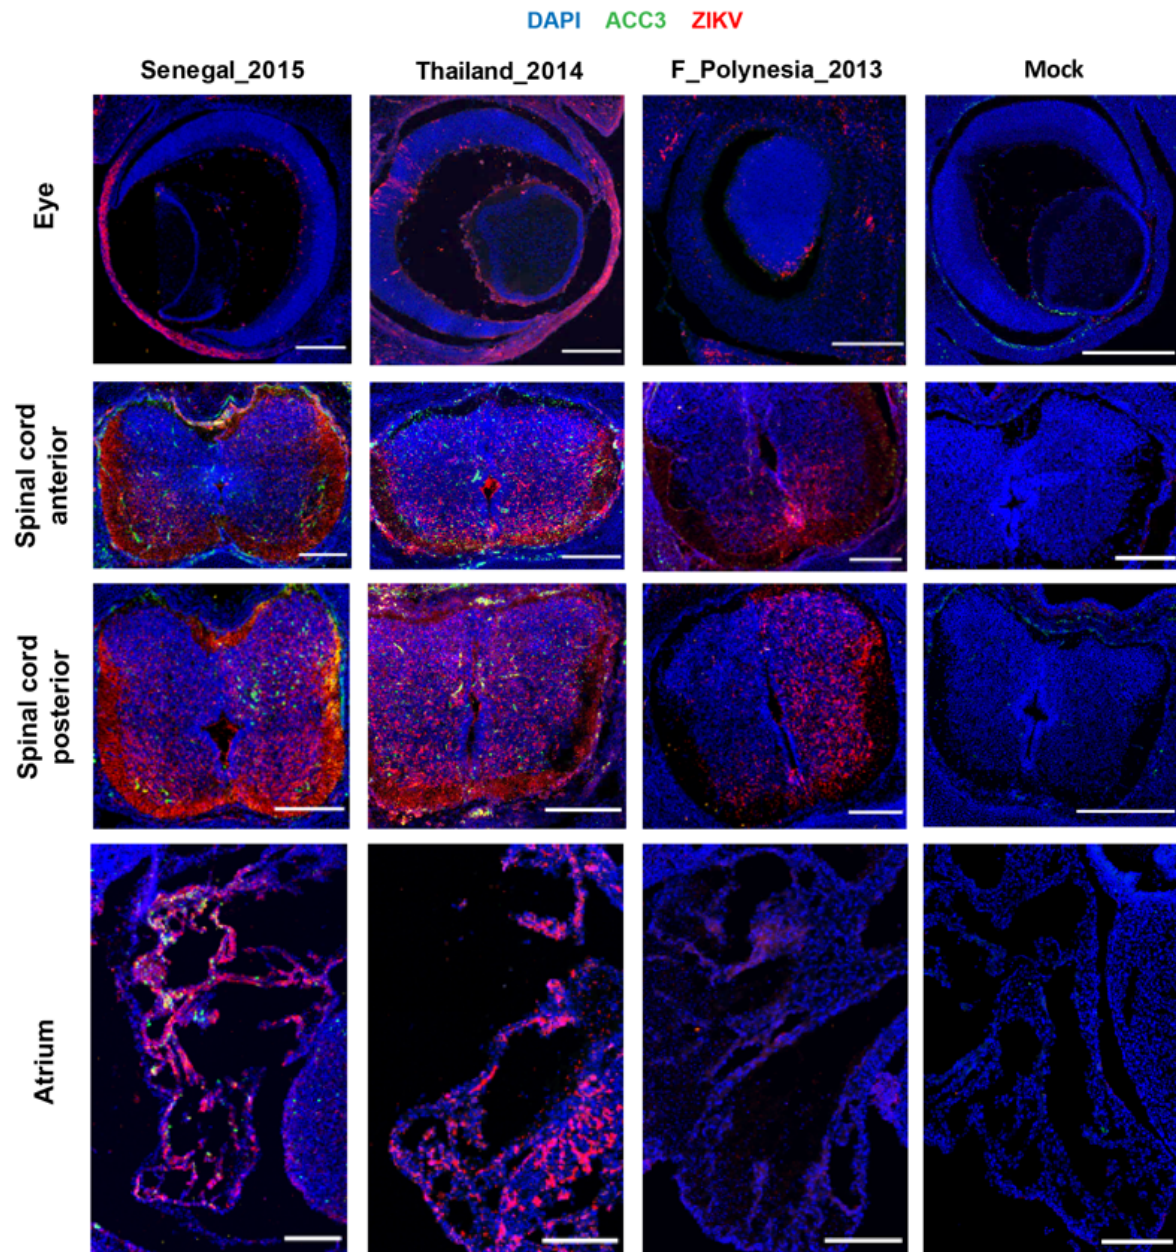

**Supplementary Fig. 5. African and Asian ZIKV strains show comparable organs tropism.** Immunocompetent mouse embryos were infected at E10.5 by intraplacental injection of 500-1,000 PFU of ZIKV and examined at E14.5 by microdissection. Immunolabeling of embryonic eye, anterior and posterior spinal cord and atrium sections representative of each ZIKV strain tested ( $n=3$  embryos per virus strain). Blue, green and red colors indicate DAPI, anti-cleaved caspase 3 (ACC3) and ZIKV stainings, respectively. The scale bars represent 200  $\mu\text{m}$ .
